# Supplementary material
Source: MDPI journal article supplement (https://www.mdpi.com/2673-7167/3/4/27)
Supplement: s1 [file s1]

Archive with 1 entries (1 files):
- physchem-2697145-supplementary.pdf
